# Supplementary material
Source: PubMed Central journal article supplement (PMC3002180)
Supplement: bc100348q_si_001.pdf [file bc100348q_si_001.pdf]

(Supporting Information)

## **Multiplexed and Reiterative Fluorescence Labeling via DNA Circuitry**

Dzifa Duose,<sup>†</sup> Ryan M. Schweller,<sup>†</sup> Walter N. Hittelman,<sup>§</sup> and

Michael R. Diehl<sup>†, ‡, \*</sup>

[\*] Michael R. Diehl

Departments of Bioengineering<sup>†</sup> and Chemistry<sup>‡</sup>, Rice University, 6100

Main Street, Houston, Texas 77005

Department of Experimental Therapeutics<sup>§</sup>, M.D. Anderson Cancer Center<sup>§</sup>,

Houston, Texas 77030

E-mail: diehl@rice.edu

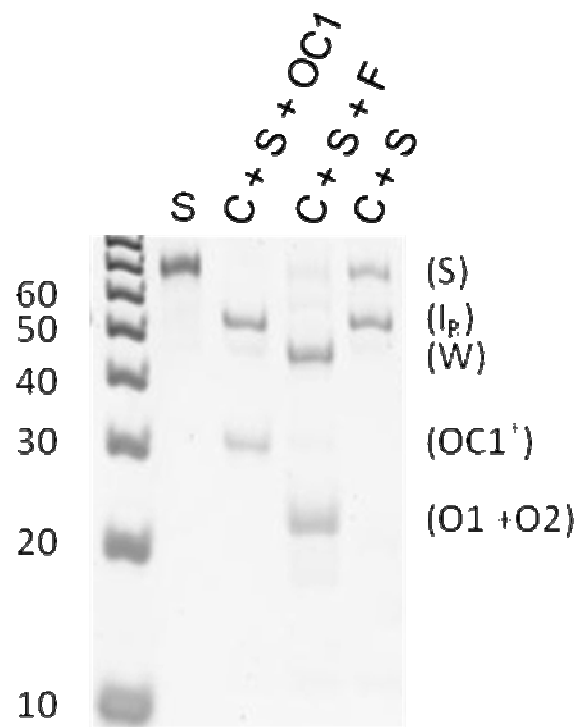

Figure S1. Complete native PAGE-gel illustrating the influence of the output sequestration reaction ( $O1 + OC1 \rightarrow OC1^*$ ) on equilibrium distributions produced by partial circuit reactions. While efficient conversion of S to  $I_R$  requires output sequestration when S and C are present at similar concentrations, the  $I_R$  complex can be disassembled near quantitatively by simply adding a fuel strand to the reaction, without the use of output sequestration components.

**Table S1.** List of oligonucleotide sequences used in design of DNA-circuits. Underlined oligonucleotides denote toehold domains. All strands are listed in 5' to 3' direction. /3AmMC6/ denotes a 3' amino modifier on carbon 6; /5Cy5/ denotes 5' Cy5 fluorophore; /5Cy3/ denotes 5' Cy3 fluorophore and /3IAbRQSp/ denotes 3' Iowa black quencher.

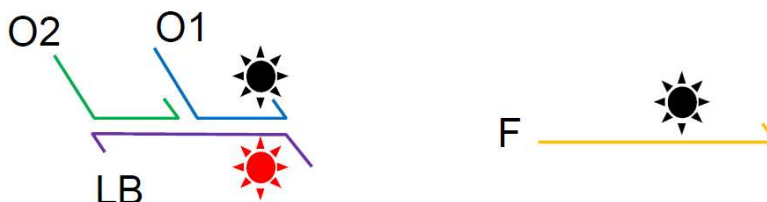

| Sequence Name    | Nucleic Acid Sequence                                                                     |
|------------------|-------------------------------------------------------------------------------------------|
| Circuit1_O1      | CCA CAT ACA TCA TAT TCC CTC ATT CAA TAC CCT ACG/3IAbRQSp/                                 |
| Circuit1_O2      | CTT TCC TAC A CC TAC GTC TCC AAC TAA CTT ACG G                                            |
| Circuit1_LB      | <u>TGG AGA</u> /iCy5/CGT AGG GTA TTG AAT <u>GAG GGC</u> CGT AAG TTA GTT GGA GAC<br>GTA GG |
| Circuit1_C       | CAT TCA ATA CCC TAC GTC TCC ATT TTT TTT TT /3AmMC6/                                       |
| Circuit1_Fuel    | CCT ACG TCT CCA ACT AAC TTA CGG CCC TCA TTC AAT ACC CTA CG/3IAbRQSp/                      |
| Circuit1_O1 comp | GTA TTG AAT GAG GGA ATA TGA TGT ATG TGG                                                   |
| Circuit1_O1short | CCA CAT ACA TCA TAT TCC CTC ATT                                                           |
| Circuit2_O1      | ACC TCT TCA CGA ACA TTT CA/3IAbRQSp/                                                      |
| Circuit2_O2      | ACC TAA TAG C AC CAC ATC AAT CTC GAT CCA GTA C                                            |
| Circuit2_LB      | <u>TGG CTA</u> /iCy3/TGA AAT GTT CGT GAA <u>GAG GTG</u> TAC TGG ATC GAG ATT GAT GTG<br>GT |
| Circuit2_C       | CTT CAC GAA CAT TTC ATA GCC ATT TTT TTT TT /3AmMC6/                                       |
| Circuit2_Fuel    | ACC ACA TCA ATC TCG ATC CAG TAC ACC TCT TCA CGA ACA TTT CA                                |
| Circuit2_O1comp  | TGT TCG TGA AGA GGT                                                                       |
| Circuit2_O1short | ACC TCT TCA                                                                               |
| Circuit3_O1      | TCA CAC ATC AAC CTC T TCTT T CTC TCG ACA CAT CAC                                          |
| Circuit3_O2      | CTT TCC TAC A CT TAT TCA TCC TTT CAC TCA CTT C                                            |
| Circuit3_LB      | <u>GAA GTG</u> AGT GAA AGG ATG AAT <u>AAG AAG</u> AGTG ATG TGT CGA GAG AAAG TAA           |
| Circuit3_C       | TCT CTC GAC ACA TCA C TTA CTT TT TTT TTT TT /3AmMC6/                                      |

|                  |                                                                                  |
|------------------|----------------------------------------------------------------------------------|
| Circuit3_Fuel    | CT TAT TCA TCC TTT CAC TCA CTT CTCTT TCT CTC GAC ACA TCA C                       |
| Circuit3_O1comp  | TGT CGA GAG AAA GAA GAG GTT GAT GTG TGA                                          |
| Circuit3_O1short | TCA CAC ATC AAC CTC TTC TTT CTC                                                  |
| Circuit4_SB      | CAC CAA CCC AAT TCT C CCTA C CCA TTC CTG TAT CAT                                 |
| Circuit4_OB      | ACC TAA TAG C TAC CTT CCC TCT ATT CAT GTC CAC                                    |
| Circuit4_LB      | <u>GTG GAC</u> ATG AAT AGA GGG AAG <u>GTATAG</u> GATG ATA CAG GAA TGG GTGG AGT   |
| Circuit4_C       | CCC ATT CCT GTA TCA T AC TCC A TT TTT TTT TT /3AmMC6/                            |
| Circuit4_Fuel    | TAC CTT CCC TCT ATT CAT GTC CAC CCT ACC CAT TCC TGT ATC AT                       |
| Circuit4_O1comp  | CAG GAA TGG GTA GGG AGA ATT GGG TTG GTG                                          |
| Circuit4_O1short | CAC CAA CCC AAT TCT C CCTA C CCA                                                 |
| Circuit5_O1      | CAT ACC ACA ACA ATT TAC TTC ACC AAC CCA TCC ACT                                  |
| Circuit5_O2      | CTT TCC TAC AAA TCG CCA AAC TAC AAA CTC AAT C                                    |
| Circuit5_LB      | <u>GAG GTG</u> AGT GGA TGG GTT GGT <u>GAA GTG</u> ATT GAG TTT GTA GTT TGG CGA TT |
| Circuit5_C       | CAC CAA CCC ATC CAC TCA CCT C TT TTT TTT TT /3AmMC6/                             |
| Circuit5_Fuel    | AAT CGC CAA ACT ACA AAC TCA ATC ACTT CAC CAA CCC ATC CAC T                       |
| Circuit5_O1comp  | TGG GTT GGT GAA GTA AAT TGT TGT GGT ATG                                          |
| Circuit5_O1short | CAT ACC ACA ACA ATT TAC TTC ACC                                                  |
| 1compcy5         | /5Cy5/TGT AGG AAA G                                                              |
| 1compcy3         | /5Cy3/GCT ATT AGG T                                                              |
